# Supplementary material for: A water destructible SnS2QD/PVA film based transient multifunctional sensor and machine learning assisted stimulus identification for non-invasive personal care diagnostics
Source: Royal Society of Chemistry journal article supplement (doi:10.1039/d0ma00573h), 2020-01-01
Supplement: d0ma00573h1.pdf [file d0ma00573h1.pdf]

## Supporting information

# Water Destructible SnS<sub>2</sub> QDs/PVA Film Based Transient Multifunctional Sensor and Machine Learning Assisted Stimulus Identification for Non-Invasive Personal Care Diagnostics

Naveen Bokka<sup>1</sup>, Venkatarao Selamneni<sup>1</sup> and Parikshit Sahatiya<sup>1\*</sup>

<sup>1</sup>Department of Electrical and Electronics Engineering, Birla Institute of Technology and Science Pilani Hyderabad Campus, Hyderabad 500078, India

\*Corresponding author: E-mail: parikshit@hyderabad.bits-pilani.ac.in

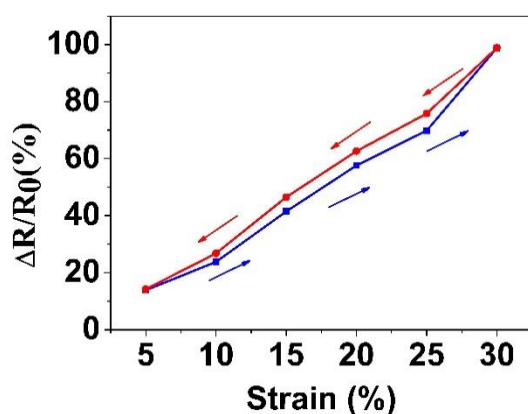

**Figure S1:** Hysteresis curve of normalised resistance against tensile strain (%).

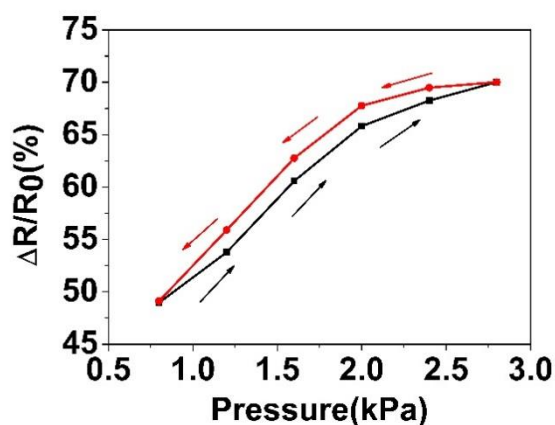

**Figure S2:** Hysteresis curve of normalised resistance against applied external pressure.
